# Supplementary material for: Production of mannosylerythritol lipids: biosynthesis, multi-omics approaches, and commercial exploitation
Source: Royal Society of Chemistry journal article supplement (doi:10.1039/d2mo00150k), 2022-06-29
Supplement: d2mo00150k1.xlsx [file d2mo00150k1.xlsx]

## Sheet: Supplementary Table 1
1 Acetyltransferase MAT1 % Identity
	Moesziomyces_antarcticus	Moesziomyces_antarcticus_T_34	Moesziomyces_aphidis_DSM_70725	Pseudozyma_tsukubaensis	Ustilago_hordei	Ustilago_cynodontis	Ustilago_shanxiensis	Sporisorium_scitamineum	Sporisorium_graminicola	Sporisorium_reilianum_SRZ2	Pseudozyma_hubeiensis_SY62	Ustilago_maydis_521
Moesziomyces_antarcticus		92.44	92.64	51.84	56.69	57.2	58.46	45.52	51.3	49.35	52.77	51.95
Moesziomyces_antarcticus_T_34	92.44		97.28	52.43	55.6	57.38	58.81	44.05	50.74	48.43	52.56	51.2
Moesziomyces_aphidis_DSM_70725	92.64	97.28		52.43	56.53	57.98	59.62	44.55	51.31	49.53	53.17	51.77
Pseudozyma_tsukubaensis	51.84	52.43	52.43		58.41	61.37	61.36	42.72	50.86	49.71	49.32	54.26
Ustilago_hordei	56.69	55.6	56.53	58.41		79.15	80.81	44.01	53.48	52.92	55.25	54.08
Ustilago_cynodontis	57.2	57.38	57.98	61.37	79.15		83.89	45.91	54.4	53.28	53.54	56.8
Ustilago_shanxiensis	58.46	58.81	59.62	61.36	80.81	83.89		46	54.06	54.96	54.93	55.74
Sporisorium_scitamineum	45.52	44.05	44.55	42.72	44.01	45.91	46		59.7	63.72	48.71	49.16
Sporisorium_graminicola	51.3	50.74	51.31	50.86	53.48	54.4	54.06	59.7		73.17	53.2	55.82
Sporisorium_reilianum_SRZ2	49.35	48.43	49.53	49.71	52.92	53.28	54.96	63.72	73.17		53.66	54.35
Pseudozyma_hubeiensis_SY62	52.77	52.56	53.17	49.32	55.25	53.54	54.93	48.71	53.2	53.66		57.49
Ustilago_maydis_521	51.95	51.2	51.77	54.26	54.08	56.8	55.74	49.16	55.82	54.35	57.49
2 Major Facilitator MMF1 % Identity
	Pseudozyma_tsukubaensis	Sporisorium_graminicola	Sporisorium_reilianum_SRZ2	Sporisorium_scitamineum	Pseudozyma_hubeiensis_SY62	Ustilago_maydis_521	Moesziomyces_antarcticus_T_34	Moesziomyces_antarcticus	Moesziomyces_aphidis_DSM_70725	Ustilago_hordei	Ustilago_cynodontis	Ustilago_shanxiensis
Pseudozyma_tsukubaensis		65.54	65.43	65.16	66.67	66.4	71.69	71.69	65.79	67.54	68.18	69.33
Sporisorium_graminicola	65.54		87.52	83.71	59.54	73.44	69.4	69.4	60.83	67.31	69.02	68.86
Sporisorium_reilianum_SRZ2	65.43	87.52		87.18	73.47	72.99	70.66	70.66	63.56	68.6	69.18	69.84
Sporisorium_scitamineum	65.16	83.71	87.18		72.76	71.15	68.93	68.21	61.92	67.42	67.79	68.65
Pseudozyma_hubeiensis_SY62	66.67	59.54	73.47	72.76		80.78	72.45	71.74	64.65	71.64	71.89	72.73
Ustilago_maydis_521	66.4	73.44	72.99	71.15	80.78		72.81	72.09	65.97	69.58	71.45	71.31
Moesziomyces_antarcticus_T_34	71.69	69.4	70.66	68.93	72.45	72.81		93.2	93.57	72.76	72.34	74.06
Moesziomyces_antarcticus	71.69	69.4	70.66	68.21	71.74	72.09	93.2		97.43	71.51	71.45	73.17
Moesziomyces_aphidis_DSM_70725	65.79	60.83	63.56	61.92	64.65	65.97	93.57	97.43		65.69	65.86	67.37
Ustilago_hordei	67.54	67.31	68.6	67.42	71.64	69.58	72.76	71.51	65.69		86.34	86.74
Ustilago_cynodontis	68.18	69.02	69.18	67.79	71.89	71.45	72.34	71.45	65.86	86.34		90.75
Ustilago_shanxiensis	69.33	68.86	69.84	68.65	72.73	71.31	74.06	73.17	67.37	86.74	90.75
3 Acyltransferase MAC1 % Identity
	Sporisorium_scitamineum	Sporisorium_graminicola	Sporisorium_reilianum_SRZ2	Pseudozyma_hubeiensis_SY62	Ustilago_maydis_521	Pseudozyma_tsukubaensis	Moesziomyces_antarcticus_T_34	Moesziomyces_antarcticus	Moesziomyces_aphidis_DSM_70725	Ustilago_hordei	Ustilago_cynodontis	Ustilago_shanxiensis
Sporisorium_scitamineum		80.34	79.36	67.56	64.55	62	59.61	60.85	60.32	59.7	60.53	61.03
Sporisorium_graminicola	80.34		82.08	67.68	66.5	60.92	59.22	59.75	60.28	58.6	58.5	59
Sporisorium_reilianum_SRZ2	79.36	82.08		68.41	66.55	62.94	60.36	62.57	61.25	60.47	61.74	61.31
Pseudozyma_hubeiensis_SY62	67.56	67.68	68.41		71.07	62.65	60.07	61.32	60.61	63.65	64.15	63.48
Ustilago_maydis_521	64.55	66.5	66.55	71.07		59.65	57.75	59.18	59	59.3	59.3	61.64
Pseudozyma_tsukubaensis	62	60.92	62.94	62.65	59.65		62.93	62.57	63.96	63.14	66.25	64.84
Moesziomyces_antarcticus_T_34	59.61	59.22	60.36	60.07	57.75	62.93		90.54	93.5	61.28	65.11	63.35
Moesziomyces_antarcticus	60.85	59.75	62.57	61.32	59.18	62.57	90.54		93.93	63.41	66.9	65.66
Moesziomyces_aphidis_DSM_70725	60.32	60.28	61.25	60.61	59	63.96	93.5	93.93		62.17	66.37	64.77
Ustilago_hordei	59.7	58.6	60.47	63.65	59.3	63.14	61.28	63.41	62.17		80.6	80.77
Ustilago_cynodontis	60.53	58.5	61.74	64.15	59.3	66.25	65.11	66.9	66.37	80.6		86.1
Ustilago_shanxiensis	61.03	59	61.31	63.48	61.64	64.84	63.35	65.66	64.77	80.77	86.1
4 Erythritol-mannosyl-transferase EMT1 % Identity
	Pseudozyma_tsukubaensis	Moesziomyces_antarcticus_T_34	Moesziomyces_antarcticus	Moesziomyces_aphidis_DSM_70725	Ustilago_hordei	Ustilago_cynodontis	Ustilago_shanxiensis	Sporisorium_graminicola	Sporisorium_reilianum_SRZ2	Sporisorium_scitamineum	Ustilago_maydis_521	Pseudozyma_hubeiensis_SY62
Pseudozyma_tsukubaensis		69.45	68.81	69.29	69.82	71.38	70.67	70.18	70.76	71.2	68.06	68.56
Moesziomyces_antarcticus_T_34	69.45		94.81	93.52	76.15	78.5	78.41	75.8	76.36	76.84	74.8	75.68
Moesziomyces_antarcticus	68.81	94.81		96.76	76.47	78.66	78.57	77.08	77.16	77.48	75.12	76.64
Moesziomyces_aphidis_DSM_70725	69.29	93.52	96.76		75.83	77.87	77.78	76.28	76.36	76.84	74.48	76.16
Ustilago_hordei	69.82	76.15	76.47	75.83		88.55	87.3	77.62	78.01	79.61	76.57	76.17
Ustilago_cynodontis	71.38	78.5	78.66	77.87	88.55		92.9	80.32	81.03	81.99	79.71	78.51
Ustilago_shanxiensis	70.67	78.41	78.57	77.78	87.3	92.9		80.39	80.77	81.73	78.81	78.9
Sporisorium_graminicola	70.18	75.8	77.08	76.28	77.62	80.32	80.39		91.41	91.41	79.81	79.25
Sporisorium_reilianum_SRZ2	70.76	76.36	77.16	76.36	78.01	81.03	80.77	91.41		93.21	80.03	79.64
Sporisorium_scitamineum	71.2	76.84	77.48	76.84	79.61	81.99	81.73	91.41	93.21		81.61	80.74
Ustilago_maydis_521	68.06	74.8	75.12	74.48	76.57	79.71	78.81	79.81	80.03	81.61		81.01
Pseudozyma_hubeiensis_SY62	68.56	75.68	76.64	76.16	76.17	78.51	78.9	79.25	79.64	80.74	81.01
5 Acyltransferase MAC2 % Identity
	Moesziomyces_antarcticus_T_34	Moesziomyces_antarcticus	Moesziomyces_aphidis_DSM_70725	Pseudozyma_hubeiensis_SY62	Ustilago_maydis_521	Pseudozyma_tsukubaensis	Ustilago_hordei	Ustilago_cynodontis	Ustilago_shanxiensis	Sporisorium_scitamineum	Sporisorium_graminicola	Sporisorium_reilianum_SRZ2
Moesziomyces_antarcticus_T_34		86.59	87.86	46.75	52.27	55.82	58.73	59.09	59.09	57.27	55.35	57.89
Moesziomyces_antarcticus	86.59		91.3	48.01	52.99	56.55	57.82	59.45	58.73	57.27	55.9	57.89
Moesziomyces_aphidis_DSM_70725	87.86	91.3		48.38	53.36	57.27	59.09	59.82	60	57.45	56.08	59.35
Pseudozyma_hubeiensis_SY62	46.75	48.01	48.38		61.48	57.32	59.49	60.22	59.67	59.03	59.64	59.28
Ustilago_maydis_521	52.27	52.99	53.36	61.48		59.93	65.03	65.03	66.3	65.09	64.61	63.52
Pseudozyma_tsukubaensis	55.82	56.55	57.27	57.32	59.93		70.49	70.86	70.86	66.55	66.06	66.61
Ustilago_hordei	58.73	57.82	59.09	59.49	65.03	70.49		86.16	87.25	69.45	70.05	68.97
Ustilago_cynodontis	59.09	59.45	59.82	60.22	65.03	70.86	86.16		91.99	70.73	72.23	70.24
Ustilago_shanxiensis	59.09	58.73	60	59.67	66.3	70.86	87.25	91.99		70.55	71.14	70.05
Sporisorium_scitamineum	57.27	57.27	57.45	59.03	65.09	66.55	69.45	70.73	70.55		82.4	82.58
Sporisorium_graminicola	55.35	55.9	56.08	59.64	64.61	66.06	70.05	72.23	71.14	82.4		83.48
Sporisorium_reilianum_SRZ2	57.89	57.89	59.35	59.28	63.52	66.61	68.97	70.24	70.05	82.58	83.48
